# Supplementary material
Source: Frontiers journal article supplement (https://www.frontiersin.org/articles/551873)
Supplement: Table_1.pdf [file Table_1.pdf]

|           |                             | Vertigo    | Dizziness    | Double Vision |
|-----------|-----------------------------|------------|--------------|---------------|
| PICA      | <b>PICA territory total</b> | <b>58%</b> | <b>35%</b>   | <b>12%</b>    |
|           | Nodulus                     | 37%        | -            | -             |
|           | Uvula                       | 32%        | 5%           | -             |
|           | Pyramis                     | 5%         | -            | -             |
|           | Flocculus                   | 10%        | -            | -             |
|           | Tonsil                      | 32%        | -            | -             |
|           | Biventer lobule             | 58%        | 25%          | -             |
|           | Inferior semilunar lobule   | 37%        | 15%          | 12%           |
|           | Superior semilunar lobule   | 5%         | 25%          | -             |
| SCA       | <b>SCA territory total</b>  | <b>10%</b> | <b>15%</b>   | <b>-</b>      |
|           | Central lobule              | 10%        | 5%           |               |
|           | Lingula                     | 10%        | 5%           |               |
|           | Post. quadrangulate lobule  | 5%         | 15%          |               |
|           | Ant. quadrangulate lobule   | 10%        | 15%          |               |
| Brainstem | <b>Brainstem total</b>      | <b>37%</b> | <b>40%</b>   | <b>88%</b>    |
|           | Medulla                     | 16%        | -            |               |
|           | Pons                        | 21%        | 20%          | 25%           |
|           | Midbrain                    | 5%         | 25%          | 75%           |
| Thalamus  | <b>Thalamus total</b>       | <b>5%</b>  | <b>10%</b>   | <b>25%*</b>   |
|           | Dorsolateral thalamus       | 5%         | 5%           | -             |
|           | Anteromedial thalamus       | -          | 5%           | 25%*          |
| Cortex    | <b>Cortex total</b>         | <b>10%</b> | <b>15%**</b> |               |
|           | Parieto-insular cortex      | 10%        | -            | -             |
|           | Occipital cortex            | -          | 15%**        | -             |

**Online Supplement 2: Involvement of vascular territories and anatomical structures in the different chief complaints in vestibular and ocular motor stroke.** For the chief complaint vertigo, the most frequent lesion sites were in the medial PICA territory (nodulus, uvula, tonsil, medial biventer, inferior semilunar lobules) and pontomedullary brainstem, for dizziness in the lateral PICA territory (lateral biventer, inferior semilunar, superior semilunar lobules), SCA territory (posterior/anterior quadrangulate lobules), and the pontomesencephalic brainstem and for double vision in the mesencephalic brainstem/thalamus. Data are shown as % of all patients with the respective chief complaint. \*All patients with double vision and anteriomedial thalamic lesions also had midbrain lesions. \*\*All patients with lesions in the occipital cortex had also lesions in the brainstem or cerebellum.
